# Supplementary material for: Repurposing calcium sensing receptor agonist cinacalcet for treatment of CFTR-mediated secretory diarrheas
Source: JCI journal article supplement (doi:10.1172/jci.insight.146823), 2021-01-05
Supplement: sd1 [file 1]

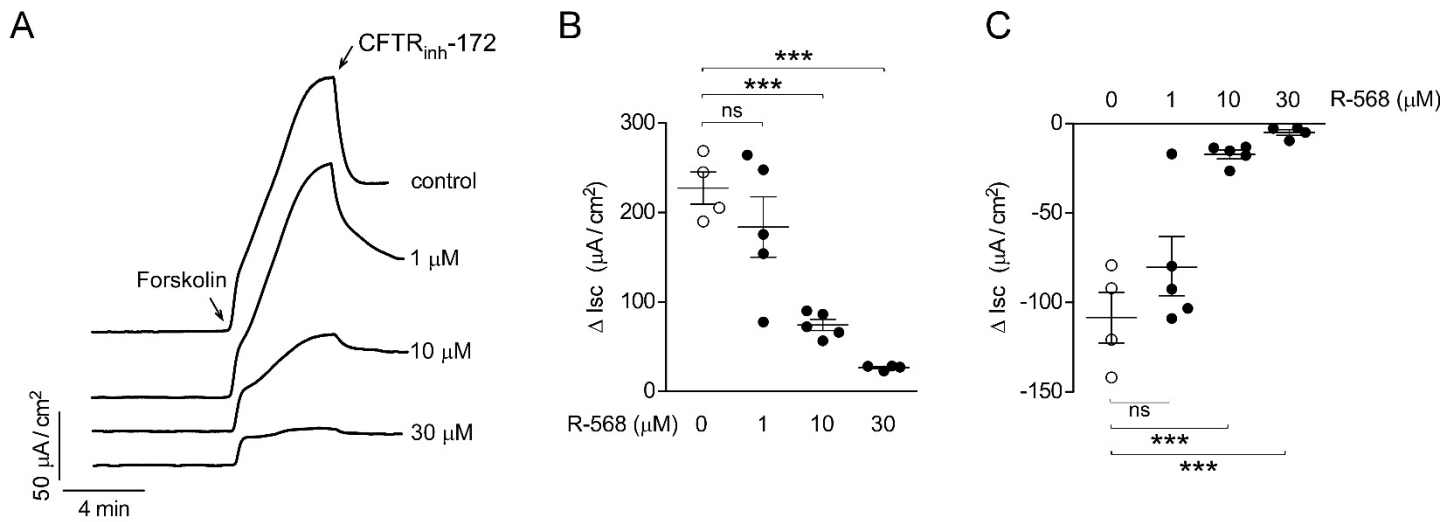

Figure S1

**Figure S1. R-568 inhibits forskolin-induced Cl<sup>-</sup> secretion in T84 cells.** **A.** Short-circuit current (I<sub>sc</sub>) traces showing maximal forskolin (10  $\mu$ M) response and CFTR<sub>inh</sub>-172 (10  $\mu$ M) inhibition following 20 min pre-treatment with indicated concentrations of R-568. **B.**  $\Delta$  I<sub>sc</sub> induced by maximal (10  $\mu$ M) forskolin at different R-568 concentrations. **C.**  $\Delta$  I<sub>sc</sub> following CFTR<sub>inh</sub>-172 (10  $\mu$ M) treatment at different R-568 concentrations. n=4-5 experiments per group. Mean  $\pm$  S.E.M., one-way analysis of variance with Newman-Keuls multiple comparisons test, \*\*\*p<0.001, ns: not significant.
